# Supplementary material
Source: Springer Nature journal article supplement (https://www.springermedizin.de/resource/supplementary/12894_2013_311_MOESM3_ESM.pdf/9513458)

**A**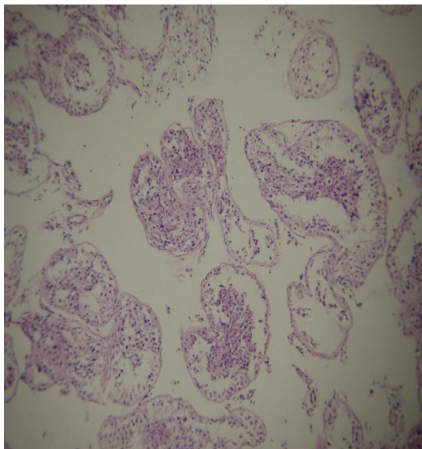**B**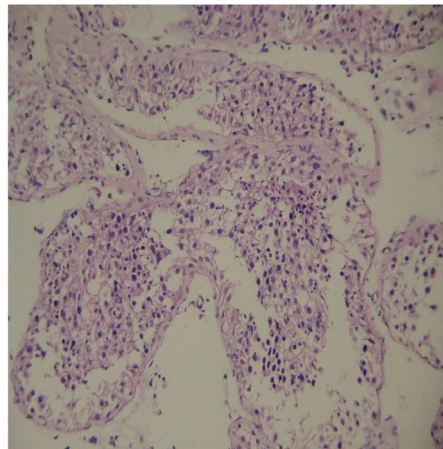**C**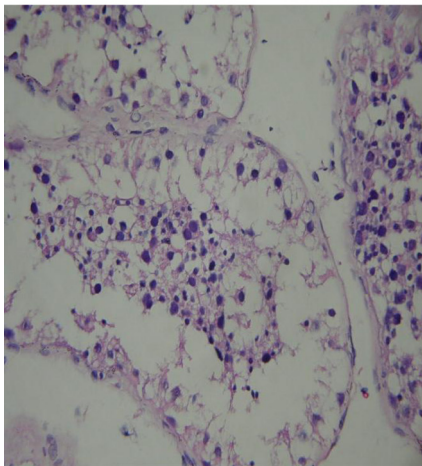**D**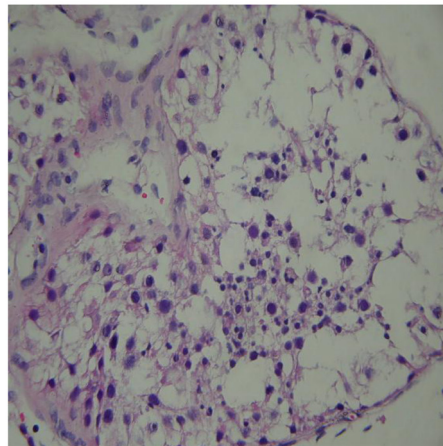

Supplement: MOESM3 [file 9513458]
